# Supplementary material
Source: HighWire-hosted journal article supplement (https://jme.bmj.com/highwire/filestream/150849/field_highwire_adjunct_files/1/medethics-2020-106990supp002_data_supplement.pdf)
Supplement: medethics-2020-106990supp002_data_supplement.pdf [file medethics-2020-106990supp002_data_supplement.pdf]

**Table 2:** Emerging moral attitudes towards risk information with example quotations (second-round coding)

| Themes (Identified ethical categories) | Sub-themes (Arguments)    | Coded for relevant data extracts (Explanations)                      | Example Quotations (German Data)                                                                                                                                                                                                                                                                                                                                                                                                                                                                                                                                        | Example Quotations (Israeli Data)                                                                                                                                                                                                                                                                                                                                                                                                                                                                     |
|----------------------------------------|---------------------------|----------------------------------------------------------------------|-------------------------------------------------------------------------------------------------------------------------------------------------------------------------------------------------------------------------------------------------------------------------------------------------------------------------------------------------------------------------------------------------------------------------------------------------------------------------------------------------------------------------------------------------------------------------|-------------------------------------------------------------------------------------------------------------------------------------------------------------------------------------------------------------------------------------------------------------------------------------------------------------------------------------------------------------------------------------------------------------------------------------------------------------------------------------------------------|
| Beneficence                            | Trust or hope in medicine | Preventive measures (Beneficence on physical level)                  | <p>WAM6III: “[...] [M]y husband got medication straight away. And I think it was helpful [...] [to] slow it [the progress of the disease] down.” (Female, FC)</p> <p>WAS23V: “I really try that we live healthy. [...] We have organic shops and so on. So relatively expensive things that earlier I would not have spent so much money. [...]” (Female, FC)</p> <p>MBS8: “So, I hope for some more training cognitive functions by going to talks, I mean and I hope, it is a hope, that I don’t basically worsen it. This is my inner conviction.” (Male, P_MND)</p> | <p>FME3: “There is no cure, but there are things [medications] that can slow [the progress] down.” (Male, R_MND)</p> <p>F10: “There is progress in research on Alzheimer’s [disease]. And there are newer medications. And with that you can stop deterioration, right? It’s already something.” (Female, P_MND)</p> <p>HF2: “[...] Due to my fears, I’m trying to do all kinds of things today, like a correct diet, physical activity, crossword puzzles and exercising my brain.” (Female, FC)</p> |
|                                        | Mistrust in medicine      | Futility (Avoiding harm on a psychological level)                    | <p>WAL12III: “[...] [T]o say or detect it very early depends a lot on what you can do about it. [...] [I]f there is nothing you can do and I simply rush towards such a disease, then I, of course, would prefer not to know anything about it. [...]” (Female, FC)</p>                                                                                                                                                                                                                                                                                                 | <p>LF3: “I wouldn’t do it because it would give me nothing. [...] [I]f there was a medicine that I knew would prevent it, of course I would do it, but with this disease, for which there is no cure, it could only delay it, so no.” (Female, FC)</p>                                                                                                                                                                                                                                                |
|                                        |                           | Skepticism towards predictive tests (diagnostic or predictive value) | <p>WAXL17IV: “[...] The diagnosis, [...] [a]nd the probability... I don’t know how high the risk is that you [will] get it. [...]” (Female, FC)</p> <p>MAXL15II: “That’s exactly the problem in my opinion. Recognition is the thing that most doctors still don’t get right. [That is] [e]xactly this topic of recognizing dementia in the early stage. [...] Doctors aren’t able to make</p>                                                                                                                                                                          | <p>TF5: “[...] But to keep it [sharing information] limited because possibly it won’t happen, the disease won’t develop, because it’s not a hundred percent certain. [...]” (Female, FC)</p> <p>TF2: “[...] Why put everybody under pressure for something that might or might not happen? It’s exactly like sitting in a shelter because missiles might be launched in another 400 years.”</p>                                                                                                       |

|                                       |                                 |                                                            | a proper diagnosis." (Male, FC)                                                                                                                                                                                                                                                                                                                                                           | (Female, FC)                                                                                                                                                                                                                                                                                                                                                                                                                                                     |
|---------------------------------------|---------------------------------|------------------------------------------------------------|-------------------------------------------------------------------------------------------------------------------------------------------------------------------------------------------------------------------------------------------------------------------------------------------------------------------------------------------------------------------------------------------|------------------------------------------------------------------------------------------------------------------------------------------------------------------------------------------------------------------------------------------------------------------------------------------------------------------------------------------------------------------------------------------------------------------------------------------------------------------|
| <b>Future-Oriented Responsibility</b> | Responsibility for one's family | Preparation (Organizing financial issues & care)           | MAM16II: "There are a lot of legal, organizational things to be clarified [...] concerning support, care and so on... And the earlier you start with organization, the better! [...] I can see nothing but advantages. [...]" (Male, FC)                                                                                                                                                  | GSF1: "I would like to say that I would like to know. [...] I have a son. I don't want to burden him. [...] I want to prepare things, to set aside funds, to prepare all kinds of things." (Female, FC)<br><br>F10: "[...] It's not worthwhile just knowing, but in order to organize things, not to get into a panic, but to know what to expect in order to get a bit organized." (Female, P_MND)                                                              |
|                                       | Responsibility of the family    | Inclusion of the family in decision-making process (Trust) |                                                                                                                                                                                                                                                                                                                                                                                           | TF5: "[...] I think my children are so devoted that they know exactly what to do, let's say if something happens to me."<br>IL: "Did you ever talk to them about what you want them to do or not to do?"<br>TF5: "Not really."<br>IL: "[...] "How will they know if you don't tell them?"<br>TF5: "I trust them! They trust me now, I'll trust them later!" (Female, FC)<br><br>ShF1: "I trust my children. [...] I rely on them on everything." (Female, P_MND) |
|                                       | Responsibility for oneself      | Healthy ageing                                             | WAL8II: "[...] I do more sports. I move more. I make more music. There are different things you can do for yourself. [...]" (Female, FC)<br><br>WBS6: "[...] I think it was good that I had the test. [...] Because I think that everyone should do something for her health or illness. [...] And [one should not] simply sit it out and put the blame on other things." (Female, P_MND) | ShF3: "Look here, it causes a certain amount of worry. But I think what can help is more activity, to go out more, to be more involved in society. That's something that can really help." (Female, P_MND)                                                                                                                                                                                                                                                       |
| <b>Self-</b>                          | Being                           | Making own life                                            | MAM16II: "[...] [F]or me self-rule or self-                                                                                                                                                                                                                                                                                                                                               | GSM2: "[...] [M]y opinion about preliminary                                                                                                                                                                                                                                                                                                                                                                                                                      |

|                                                 |                                                 |                                                     |                                                                                                                                                                                                                                                                                                                                                                                                                                                                                                                                                                      |                                                                                                                                                                                                                                     |
|-------------------------------------------------|-------------------------------------------------|-----------------------------------------------------|----------------------------------------------------------------------------------------------------------------------------------------------------------------------------------------------------------------------------------------------------------------------------------------------------------------------------------------------------------------------------------------------------------------------------------------------------------------------------------------------------------------------------------------------------------------------|-------------------------------------------------------------------------------------------------------------------------------------------------------------------------------------------------------------------------------------|
| <b>Determination</b>                            | autonomous in one's (future-directed) decisions | decisions and honoring one's wishes                 | determination is the highest good of an individual [...] and nobody has the right to revise the decision that was made out of free will. And if I would personally see this or realize that someone would do that, I would incredibly be angry. [...]" (Male, FC)<br><br>WBS1: "[...] [W]hy do other people determine, [...] [why] anyone else is allowed to decide for me? [...] [W]hen I say that [I don't want to live anymore] with a clear mind and it's my opinion, then I also want it to be accepted." (Female, P_MND)                                       | instructions is not honor them one hundred percent, but one thousand percent. His wishes must be honored. The person himself must decide!" (Male, FC)                                                                               |
|                                                 |                                                 | Planning suicide or active euthanasia               | WAL20IV: "[...] And I think if you indeed have the probability... [...] I think you can think more clearly about it with a certain distance. To organize things – If there is a pill that can end one's life immediately or some [other] things, I think. But, at least, I have the option to think about it." (Female, FC)<br><br>WBS1: "[...] [I]f there is really such a diagnosis, I would like to go to somewhere, I already have, [...] to Switzerland. [...] My life would not be as it was used to be. And I do not want that. That is why." (Female, P_MND) | F6: "So I think that it's the right and proper way to make a kind of will and when the time comes that you no longer have control over yourself or for any other reason, they should help you end your life. [...]" (Female, P_MND) |
| <b>Self-Identity and Visions of a Good Life</b> | Spoiling joy of life                            | Negative emotional reactions (Psychological burden) | MAXL15II: "[...] [F]or me it would be a catastrophe. [...] I'm living at the moment! I am active now. [...] [I]f I knew today in five years I'll be so demented that I won't be able to do anything [...] I don't care at all! [...] I'm living now. And I want to enjoy it! That's the way I see it." (Male, FC)<br><br>WAS14III: "As everything I haven't got,                                                                                                                                                                                                     | F7: "[...] If we live with the thought that 'something is liable to happen', it will spoil our lives now and we won't have a life. We will constantly live in fear. [...]" (Female, P_MND)                                          |

|  |                       |                             |                                                                                                                                                                                                                                                                                                                                            |                                                                                                                                                                                                                                                                                                                                                                                                                                         |
|--|-----------------------|-----------------------------|--------------------------------------------------------------------------------------------------------------------------------------------------------------------------------------------------------------------------------------------------------------------------------------------------------------------------------------------|-----------------------------------------------------------------------------------------------------------------------------------------------------------------------------------------------------------------------------------------------------------------------------------------------------------------------------------------------------------------------------------------------------------------------------------------|
|  |                       |                             | which I'm diagnosed with as possible, or, let me say, that I might fall ill with. That is a strain for me! [...] I think, we should use our time in life to live happily and contented during the time we are healthy. Early detection is much more important when it finally starts. [...]" (Female, R_MND)                               |                                                                                                                                                                                                                                                                                                                                                                                                                                         |
|  | Seizing the day       | Making the best out of life | WAXL1: "... [W]e took care of my demented parents for six years [...] since then I have a different attitude towards life, namely the day, the present, I also tell it to my children: 'Accept what comes to you, engage yourself, do something, together, alone, how it comes because you don't know what will come.' [...]" (Female, FC) | FME8: "[...] [If] I know it [predictive information], great, I will plan, enjoy life, travel, I will enjoy it and seize it till the end..." (Female, R_MND)                                                                                                                                                                                                                                                                             |
|  | Impact of personality | Self-characterizations      |                                                                                                                                                                                                                                                                                                                                            | LF3: "Here the individual's personality really enters the picture. Someone might want to fight it, if they already told her. I'm against that. But if she's the type who tends to depression, it's awful." (Female, FC)<br><br>GSF5: "I would very much like to undergo a test like that because I'm very realistic. [...] I want to prepare for coming years and know what to expect. I can see advantages in that test." (Female, FC) |
